# Supplementary material for: In vitro gene expression and enzyme catalysis in bio-inorganic protocells
Source: Royal Society of Chemistry journal article supplement (doi:10.1039/c1sc00183c), 2011-01-01
Supplement: c1sc00183c.pdf [file c1sc00183c.pdf]

## ***In vitro* gene expression and enzyme catalysis in bio-inorganic protocells**

*Mei Li<sup>1</sup>, David C. Green<sup>1</sup>, J. L. Ross Anderson<sup>2</sup>, Bernard P. Binks<sup>3</sup>, Stephen Mann<sup>1\*</sup>*

### **Supplementary Figures**

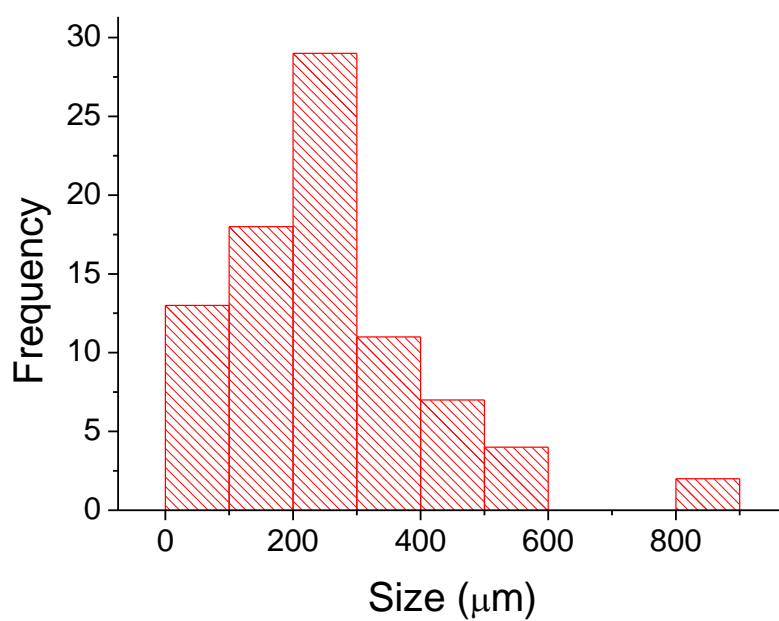

**Figure S1** Histogram showing size distribution of colloidosomes produced in dodecane at  $\phi_w = 0.033$  and a loading of 0.3 mg silica nanoparticles per  $\mu\text{L}$  of aqueous phase.

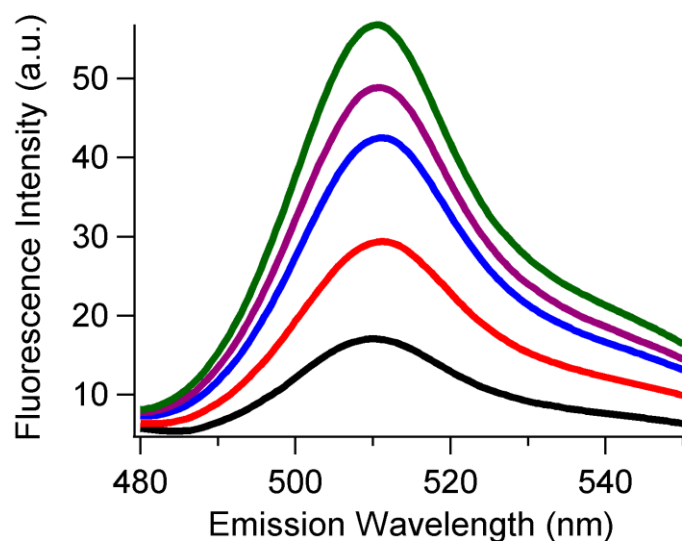

**Figure S2** Time dependent eGFP fluorescence spectra recorded at 37°C in bulk aqueous solution containing the plasmid pEXP5-NT/eGFP and a cell-free *in vitro* gene expression solution after 0 (black), 20 (red), 160 (blue), 270 (purple), and 1440 (green) min.

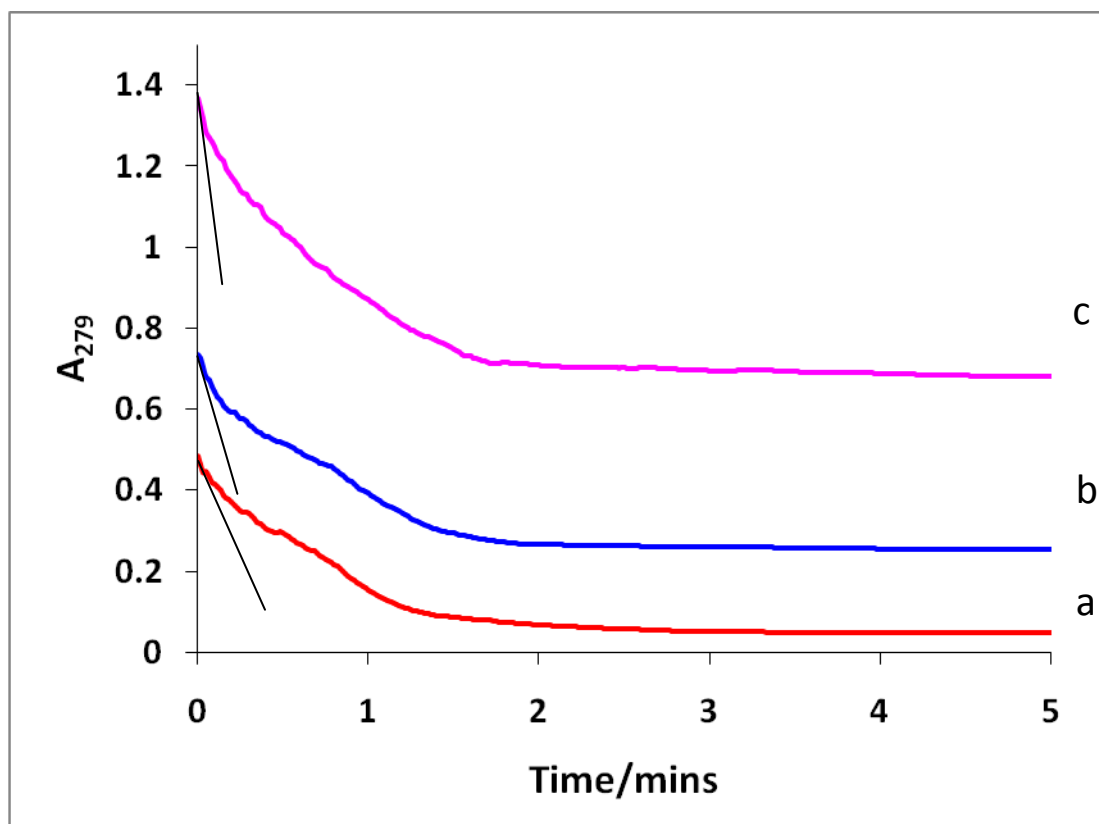

**Figure S3** Kinetic curves for colloidosome-entrapped chymotrypsin showing changes with time in the intensity at 279 nm in dodecane after addition of substrate N-benzoyl-L-tyrosine ethyl ester (BTEE) to the oil phase at a concentration of (a) 0.5 mM, (b) 0.75 mM and (c) 1 mM. ( $\phi_w = 0.033$ , loading = 0.3 mg silica nanoparticles per  $\mu\text{L}$  of aqueous phase). The initial reaction rates were determined from the first 10-20 seconds of the reaction.

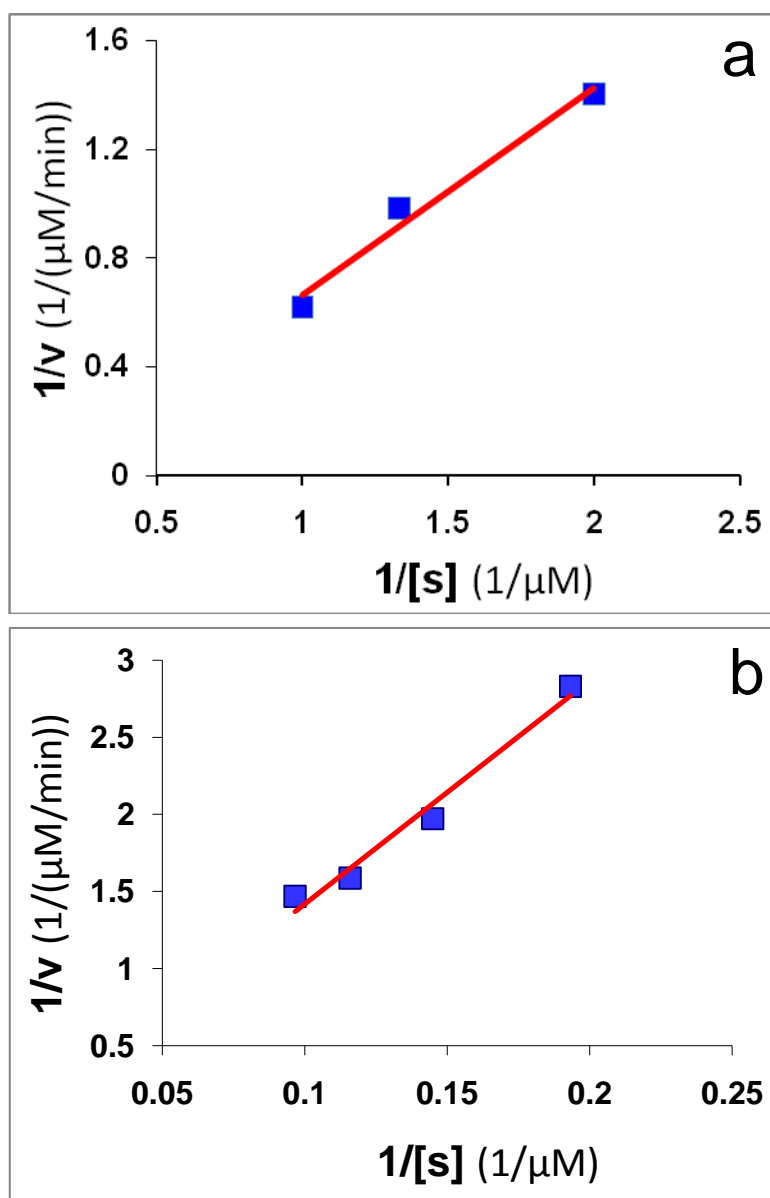

**Figure S4** Lineweaver-Burk plots ( $1/v$  ( $v$  = initial rate against  $1/[S]$  ( $S$  = substrate concentration) of (a) chymotrypsin (ChTRP) and (b) alkaline phosphatase (ALP) catalyzed reactions in silica nanoparticle-stabilized colloidosomes.
